# Supplementary material for: The acid ceramidase/ceramide axis controls parasitemia in Plasmodium yoelii-infected mice by regulating erythropoiesis
Source: eLife. 2022 Sep 12;11:e77975. doi: 10.7554/eLife.77975 (PMC9499531; doi:10.7554/eLife.77975)
Supplement: Figure 1—source data 1. [file elife-77975-fig1-data1.xlsx]

## Sheet: Fig. 1
B
	Fold change Asah1 expression
	Spleen		Thymus		Liver
	Ac WT	Ac KO	Ac WT	Ac KO	Ac WT	Ac KO
	0.649929	0.175127	1.79371	0.090803	1.24991	0.004044
	1.35007	0.100955	1.04829	0.004424	0.730741	0.005048
	0.814414	0.157954	0.157996	0.009947	1.01935	0.006121
	1.33956	0.039303	1.12722	0.049319	0.982253	0.014514
	0.846021	0.035455	0.974021	0.071144	0.894424	0.022589
		0.065909	0.898763	0.056661	1.12332	0.016495
C
	Ceramide Spleen d0
		Ac WT				Ac KO
	Total	342.098	393.681	448.3	489.986	2427.94	1671	2871.63
	C16	61.929	88.21	104.212	127.241	924.794	584.186	1037.67
	C18	11.276	15.42	15.086	20.911	139.095	85.346	148.17
	C20	7.31	11.525	9.087	11.273	75.301	50.826	90.267
	C22	32.232	41.135	43.691	48.885	179.244	118.016	212.631
	C24	96.614	94.306	115.367	119.252	204.955	144.309	240.841
	C24:1	132.737	143.086	160.858	162.424	904.554	688.317	1142.05
