# Supplementary material for: The acid ceramidase/ceramide axis controls parasitemia in Plasmodium yoelii-infected mice by regulating erythropoiesis
Source: eLife. 2022 Sep 12;11:e77975. doi: 10.7554/eLife.77975 (PMC9499531; doi:10.7554/eLife.77975)
Supplement: Figure 2—figure supplement 1—source data 1. [file elife-77975-fig2-figsupp1-data1.xlsx]

## Sheet: Fig. 2-figure supplement 1
	Ki67+ of CD4+ T cells		Ki67+ of CD8+ T cells			CD49d+CD11a+ of CD4+ T cells		CD11a+ of CD8+ T cells			PD1+ of CD4+ T cells		PD1+ of CD8+ T cells
	Ac WT	Ac KO	Ac WT	Ac KO		Ac WT	Ac KO	Ac WT	Ac KO		Ac WT	Ac KO	Ac WT	Ac KO
	42.6	11.3	57.7	9.3		28.9	5.1	80.4	16.6		54.1	10.2	51.6	9.6
	37.1	45.1	45	45.7		27.3	29.3	74.8	68.9		52.5	52.4	42.4	33.2
	34.3	38.3	37	39.7		22.5	22.8	75.1	72.3		31.4	29.2	31.4	29.2
	42.6	47.1	38.6	67.8		20.5	22.1	80	89.6		36.4	53.9	36.4	53.9
	39.8	46.5	22.3	50.1		20	17.8	65.7	72.8		44.4	32.9	17.6	32.9
	37.7	21.3	24.2	40.9		20.1	8.2	68.3	64.8		48	24.4	18.4	25.4
	45.2	34.5	40	54.9		20.8	15.4	76.2	83.5		52	44.2	26.6	21.1
	38.1	39.5	28.4	45.8		15	15.3	61.9	68.4		42.9	34.4	17.9	21.2
	40.2	52.5	32.9	54.9		18.6	16.6	67.9	73.3		46.6	31.9	21	19.4
