# Supplementary material for: The acid ceramidase/ceramide axis controls parasitemia in Plasmodium yoelii-infected mice by regulating erythropoiesis
Source: eLife. 2022 Sep 12;11:e77975. doi: 10.7554/eLife.77975 (PMC9499531; doi:10.7554/eLife.77975)
Supplement: Figure 2—source data 1. [file elife-77975-fig2-data1.xlsx]

## Sheet: Fig. 2
A												B
	Parasitemia												Spleen weight
	d3		d7		d10		d14						d7		d14
	Ac WT	Ac KO	Ac WT	Ac KO	Ac WT	Ac KO	Ac WT	Ac KO					Ac WT	Ac KO	Ac WT	Ac KO
	0.68	0.23	4.97	0.51	17.46	4.57	34.6	10.27					0.497	0.0777	1.2186	0.5128
	0.75	0.36	2.62	3.51	7.03	6.58	32.6	30.8					0.5322	0.0313	0.9105	0.7341
	0.32	0.19	0.83	2.08	6.43	5.58	16.13	19.32					0.4808	0.0749	0.8849	1.1343
	0.32	0.36	2.29	1.38	9.23	6.89	29.02	11.94					0.6049	0.2431	1.039	0.8081
	1.28	0.24	2.39	1.29	6.18	3.1	11.8	20.01					0.4423	0.205	0.9601	0.7558
	1.26	0.44	1.23	1.01	6.67	13.37	7.59	31.65					0.606	0.0731	0.7092	0.818
	1.56	0.15	7.8	1.3	10.22	20.67	12.09	29.11					0.4722	0.246	1.0384	0.8183
	0.53	0.25	3.89	0.99	7.77	11.52	18.85	14.93					0.4048		1.0128	1.0771
	0.35	0.39	4.3	1.15	6.74	12.37	16.59	14.5					0.4128		0.9731	1.237
	1.06	0.13	2.14	0.95	9.65	13.51
	0.98	0.31	2.77	0.8	7.39	14.39
	1.23	0	3.47	0.69	8.7	5.05
	1.42	0	3.14	1.76	8.93	10.52
	0.91	0.08	3.2	1.01	8.28	7.34
	1.25	0	3.45	2.38	7.32	2.25
	1.07	0	3.64	0.56	7.57	5.35
	1.44	0.14	3.08	1.48	6.91	13
		0.04	3.46	4.07	14.63	2.89
C
	CD4+ of viable cells		CD8+ of viable cells			Foxp3+ of CD4+ T cells
	Ac WT	Ac KO	Ac WT	Ac KO		Ac WT	Ac KO
	14.5	12.8	17.2	17.1		7.9	16.4
	14.9	22.1	15.4	21.9		9	12.8
	17.2	7.2	14.6	10.2		7.9	24.2
	14.7	14.1	18.3	15.4		8.5	13.7
	18.1	12.6	12.9	13.2		7.5	10.2
	13	14.2	13.7	12.7		7.5	15.6
	14.7	10.1	13.3	10.8		7.6	12
	11.5		11.8			9.1
	11.5		10.4			7.8
D
	Ki67+ of CD4+ T cells		Ki67+ of CD8+ T cells			CD49d+CD11a+ of CD4+ T cells		CD11a+ of CD8+ T cells			PD1+ of CD4+ T cells		PD1+ of CD8+ T cells
	Ac WT	Ac KO	Ac WT	Ac KO		Ac WT	Ac KO	Ac WT	Ac KO		Ac WT	Ac KO	Ac WT	Ac KO
	39.6	21	63.7	23.5		22.2	11.5	84.3	44.5		58.2	20.4	31.6	5.4
	38.8	5.3	58.6	9.8		22.9	5.6	83.3	11.1		54.1	8.1	31	4.1
	36.7	35.2	52.4	22.5		19.5	10.6	79.1	55.8		34.2	16.3	16.1	3.3
	26.4	17	33.1	15.7		19.5	10.1	81.6	33.4		42.9	8.6	20.3	2.1
	27.2	32.4	24.9	26.6		16	15.8	74.1	42.1		36.2	20.5	18.2	4.1
	36.7	8.8	46.8	13.7		28.7	9.5	83.6	35.3		50.9	6.7	15.1	4.9
	32.5	30.5	41.5	26		20.9	16.4	78.9	49.9		43.8	22.2	21.1	3.8
	40.4		45.9			24		82.1			49.4		24.2
	41.2		43.9			23.9		77.2			49.8		25.4
