# Supplementary material for: The acid ceramidase/ceramide axis controls parasitemia in Plasmodium yoelii-infected mice by regulating erythropoiesis
Source: eLife. 2022 Sep 12;11:e77975. doi: 10.7554/eLife.77975 (PMC9499531; doi:10.7554/eLife.77975)
Supplement: Figure 3—source data 1. [file elife-77975-fig3-data1.xlsx]

## Sheet: Fig. 3
A
	Fold change Asah1 expression
	CD4+		CD8+
	Ac CD4cre WT	Ac CD4cre KO	Ac CD4cre WT	Ac CD4cre KO
	1.10134	1.90726e-05	1.21841	0.0523091
	0.898664	2.00408e-05	1.36947	0.0171747
		0.00213845	0.326117	0.0235493
		0.001636	1.086	0.00952058
B
	Parasitemia
		Ac CD4cre WT									Ac CD4cre KO
	d3	1.44	1.15	1.84	1.7	0.87	1.54	0.88	0.98	1.16	2.04	1.87	1.28	1.28	0.47	0.76	1.06	1.23	1.86	1.27
	d7	3.24	2.11	2.95	2.38	2.37	1.92	3.92	3.16	3.06	2.9	2.44	2.17	2.32	1.29	1.66	3.49	6.15	3.03	3.02
	d10	3.27	4.94	5.52	8.36	5.91	9.63	11.88	10.7	8.28	4.57	3.55	2.99	6.09	5.57	4.74	8.1	15.43	15.81	11.24
	d14	13.05	21.06	19.06	21	10.35	17.86	21.71	33.69	35.78	30.14	18.53	11.03	14.83	21.06	7.09	10.15	33.18	38.05	30.36
	Spleen weight
	d7		d14
	Ac CD4cre WT	Ac CD4cre KO	Ac CD4cre WT	Ac CD4cre KO
	0.4096	0.3311	0.8924	1.0411
	0.4552	0.5185	1.0193	0.8749
	0.5248	0.36	1.1943	1.0808
	0.4713	0.3693	1.115	0.9896
	0.3958	0.4586	0.8831	1.2325
	0.382	0.3795	0.9617	0.8357
	0.309	0.3051	0.9163	0.9891
		0.3829	1.4787	0.9222
			0.9733	1.3371
				1.1758
C
	Fold change Asah1 expression
	Macrophages Spleen		Macrophages pLavage			Dendritic cells Spleen		Dendritic cells pLavage			Neutrophils Spleen		Neutrophils Blood
	Ac Lyz2cre WT	Ac Lyz2cre KO	Ac Lyz2cre WT	Ac Lyz2cre KO		Ac Lyz2cre WT	Ac Lyz2cre KO	Ac Lyz2cre WT	Ac Lyz2cre KO		Ac Lyz2cre WT	Ac Lyz2cre KO	Ac Lyz2cre WT	Ac Lyz2cre KO
	0.635885	0.176146	1.0001	0.0638198		1.22385	0.582641	0.850968	0.152618		1	0.34228	1.11789	0.299358
	1.36411	0.17619	1	0.0733935		0.776151	0.433556	1.14903	0.125959		1.10383	0.10927	0.882112	0.0189153
	1	0.099894	0.9999	0.00327248		0.926392	0.627897	1.33523	0.278002		0.896171	0.255471
	1	0.163838		0.043843		0.735643	0.283456	0.890221	0.245982
	0.572894	0.02194				1.33797		0.774548
	1.42711	0.083854
D
	Parasitemia
		Ac Lyz2cre WT									Ac Lyz2cre KO
	d3	0.47	1.31	0.76	0.94	0.78	0.74	0.67	0.74	0.66	1.14	1.06	1.13	1.27	1.11	0.54	0.94	1.01	0.57
	d4	1.37	1.03	1.07	0.79	0.61	1.81	2.86	1.34	1.94	1.04	1.54	1.09	1	1.28	1.25	2.19	1.25	1.98
	d7	2.69	3.33	3.24	3.24	4.88	2.38	1.99	2.73	4.55	2.84	4.26	1.68	2.53	4.94	1.86	2.46	2.37	2.33
	Spleen weight
	d4		d7
	Ac Lyz2cre WT	Ac Lyz2cre KO	Ac Lyz2cre WT	Ac Lyz2cre KO
	0.266	0.209	0.4167	0.4242
	0.2686	0.2276	0.5582	0.4348
	0.2584	0.2135	0.4994	0.3111
	0.2549	0.2472	0.3925	0.3515
	0.2168	0.2041	0.6338	0.494
	0.1617	0.2185	0.303	0.4025
	0.2285	0.2729	0.3145	0.3412
	0.2436	0.2048	0.304	0.3152
	0.2034	0.1822	0.2268	0.2527
