# Supplementary material for: The acid ceramidase/ceramide axis controls parasitemia in Plasmodium yoelii-infected mice by regulating erythropoiesis
Source: eLife. 2022 Sep 12;11:e77975. doi: 10.7554/eLife.77975 (PMC9499531; doi:10.7554/eLife.77975)
Supplement: Figure 4—figure supplement 1—source data 1. [file elife-77975-fig4-figsupp1-data1.xlsx]

## Sheet: Fig. 4-figure supplement 1
	Erythropoietic stage Bone marrow
	Eb		Ret		Ery
	Ac WT	Ac KO	Ac WT	Ac KO	Ac WT	Ac KO
	22.9	37.7	42.6	45.9	33.8	15.9
	34.8	23.7	45.8	37.5	19.1	38
	17.5	37.6	39.3	31	42.4	31
	20.4	0.084	37.1	0.39	42	99.5
	13.3	12.8	33.4	19.6	52.4	67.4
	29.4	10.5	42.6	22	26.3	67.2
	24.7	34.4	27	38.9	47.9	26.3
	17.1	46.5	33.7	29.2	48.4	23.1
	32.7	11.5	42.7	7.94	23.9	79.8
	22.6	42.8	40.3	37.5	36.5	19.4
	18	25.6	32.2	37.8	49.1	35.8
	39.6	44.6	42.5	35.8	17	18.8
