# Supplementary material for: The acid ceramidase/ceramide axis controls parasitemia in Plasmodium yoelii-infected mice by regulating erythropoiesis
Source: eLife. 2022 Sep 12;11:e77975. doi: 10.7554/eLife.77975 (PMC9499531; doi:10.7554/eLife.77975)
Supplement: Figure 4—source data 1. [file elife-77975-fig4-data1.xlsx]

## Sheet: Fig. 4
B
	Ter119+CD71+ Blood
	d0		d3		d7		d10
	Ac WT	Ac KO	Ac WT	Ac KO	Ac WT	Ac KO	Ac WT	Ac KO
	0.5	0.1	2.6	0	2.2	1.4	6.5	9
	1	0	2.4	0.1	4.9	3.4	6.4	3.2
	3.7	0.1	1.8	0.1	4.4	1.6	6.6	7.2
	2.1	0	6.2	0	8.1	0.2	7	3.9
	2.5	0	3.1	1.3	4.2	0.4	6.1	5
	2.5	0	1.1	0.7	3.4	0.9	5.3	4.7
	3.2	0	0.6	0	2.6	1.3	4.5	14.4
	2.7	0	0.4	0	2.3	2.4	3.8	0.8
	2.3	0	0.8	0	2.7	5.5	9.3
	3.1	0	0.5	0.2	2.1	0.7
	3	0	0.6	0.1	3.3	1.8
	3.1	0	2.1	0.9	1.7	4.3
	2.3	0	0.8	0.2	1.6
	1.8	0	0.7		2
	1.9		1.3		1.8
D
	Erythropoietic stage Bone marrow
	d0							d7 P. yoelii
	Eb		Ret		Ery			Eb		Ret		Ery
	Ac WT	Ac KO	Ac WT	Ac KO	Ac WT	Ac KO		Ac WT	Ac KO	Ac WT	Ac KO	Ac WT	Ac KO
	25.9	0.034	31.9	0.31	41.2	99.2		29.9	47.8	46.2	39	23.4	11.7
	28.3	0.021	38.1	0.24	32.9	98.6		31.5	47.1	48.1	41.8	20	10.2
	23.8	0.013	43.4	0.24	31.3	98.7		32.8	36.7	42.9	35.8	23.9	26.8
	21.4	0.028	34.2	0.13	44.2	99.7		38.4	7.16	38.3	9.25	22.8	83.5
	15.9	0.037	28.1	0.16	55.7	99.6		30.7	38	39.5	48.5	29.2	12.3
	26.4	0.022	31.9	0.13	41.6	99.6		23	18.3	31.3	18	45.1	62.9
	25.9		32.4		41.3			20	24.9	44.6	27.5	34.6	46.8
								37.4	27.5	37.3	34.9	24.3	36.2
								28.3	24.4	40.7	17.8	30.5	57
								50.8		34.2		13.9
								29.9		35.5		34.1
