# Supplementary material for: The acid ceramidase/ceramide axis controls parasitemia in Plasmodium yoelii-infected mice by regulating erythropoiesis
Source: eLife. 2022 Sep 12;11:e77975. doi: 10.7554/eLife.77975 (PMC9499531; doi:10.7554/eLife.77975)
Supplement: Figure 5—figure supplement 1—source data 1. [file elife-77975-fig5-figsupp1-data1.xlsx]

## Sheet: Fig. 5-figure supplement 1
	Ceramide Bone marrow d7 Non-infected
		Ac WT								Ac KO
	Total	33.644	27.246	25.601	29.392	18.281	23.715	51.769	27.229	107.785	115.61	106.57	136.311	238.024	217.363	145.867
	C16	9.655	7.397	7.002	7.822	5.259	6.471	14.749	7.414	45.39	47.886	42.097	59.556	95.172	87.757	56.967
	C18	0.871	0.667	0.686	0.723	0.574	0.717	1.329	0.675	4.185	4.482	4.008	7.075	10.965	10.847	4.276
	C20	0.403	0.272	0.299	0.354	0.262	0.326	0.632	0.34	1.702	1.818	1.698	3.36	5.105	5.195	2.082
	C22	3.513	2.581	2.57	3.139	2.062	2.718	6.346	2.797	11.567	11.452	11.046	14.16	27.19	25.479	14.379
	C24	7.794	7.764	6.083	7.134	4.17	5.996	12.071	6.486	15.412	17.095	16.393	14.259	30.9	27.934	21.478
	C24:1	11.408	8.565	8.961	10.221	5.955	7.489	16.642	9.516	29.528	32.878	31.328	37.903	68.692	60.151	46.685
	Sphingomyelin Bone marrow d7 Non-infected
		Ac WT								Ac KO
	Total	372.074	307.893	265.139	310.691	171.611	240.043	501.882	253.91	298.179	304.303	303.856	329.006	677.148	477.897	455.575
	C16	198.941	168.981	143.865	162.016	99.624	132.425	279.093	138.407	164.138	167.167	159.663	183.497	351.373	264.871	237.472
	C18	9.447	6.469	7.07	8.021	5.344	6.336	12.498	6.536	7.131	7.611	7.621	13.088	19.034	14.886	9.547
	C20	6.016	4.42	4.469	5.207	3.227	3.958	7.294	4.334	4.369	4.867	4.441	8.294	12.251	8.938	5.866
	C22	31.376	25.474	22.227	27.583	14.127	20.42	45.053	21.085	27.341	26.628	27.301	33.694	70.97	45.766	39.387
	C24	23.798	24.419	16.61	21.838	10.479	17.267	26.593	16.083	18.062	17.433	19.916	16.146	33.382	20.586	25.604
	C24:1	102.496	78.13	70.898	86.026	38.81	59.637	131.35	67.465	77.139	80.595	84.914	74.286	190.139	122.851	137.699
