# Supplementary material for: The acid ceramidase/ceramide axis controls parasitemia in Plasmodium yoelii-infected mice by regulating erythropoiesis
Source: eLife. 2022 Sep 12;11:e77975. doi: 10.7554/eLife.77975 (PMC9499531; doi:10.7554/eLife.77975)
Supplement: Figure 5—source data 1. [file elife-77975-fig5-data1.xlsx]

## Sheet: Fig. 5
A										B
	Fold change Asah1 expression										Fold change Asah2 expression
	d0		d7		d10						d0
	Ac WT	Ac KO	Ac WT	Ac KO	Ac WT	Ac KO					Ac WT	Ac KO
	1.1301	0.006741	1.04501	0.002574	1.06674	0.002757					0.946356	4.15149
	0.870589	0.005049	0.732544	0.001033	1.12025	0.000987					0.85807	2.25926
	0.999314	0.004395	1.22245	0.000956	1.11778	0.000371					1.19557	4.98515
	1.3722	0.001795	0.808454	0.001656	1.00724	0.00015					1.33667	2.4016
	0.867686	0.000667	1.23632	0.001934	1.13556	0.000828					0.830677	3.02166
	1.30164	0.000577	0.955221		0.826548	0.000411					0.847293	3.40492
	0.458468				0.991054	0.000746					0.985361
					0.997946	0.000565
					0.736885
C
	Ceramide Bone marrow d0									Ceramide Bone marrow d7 P. yoelii
		Ac WT				Ac KO					Ac WT						Ac KO
	Total	46.23	51.976	37.017	34.016	84.585	127.978	94.578		Total	37.246	63.486	32.365	25.44	24.627	32.736	115.313	180.105	245.759	169.161	116.02
	C16	13.84	15.659	10.988	10.894	36.561	53.236	40.356		C16	10.226	18.545	8.71	5.875	6.58	8.816	43.885	70.976	94.897	67.877	49.101
	C18	1.66	1.775	1.092	1.066	4.195	6.595	4.556		C18	1.195	2.324	1.264	0.922	0.838	0.822	4.864	8.933	12.414	7.183	4.945
	C20	0.566	0.605	0.449	0.447	1.871	2.999	2.026		C20	0.52	0.948	0.504	0.325	0.338	0.356	2.046	3.504	5.007	3.245	1.882
	C22	4.791	5.159	4.066	3.833	8.112	12.038	9.424		C22	4.147	6.814	3.395	2.387	2.386	3.174	12.226	18.363	26.591	18.906	10.711
	C24	9.718	11.498	8.058	6.933	8.577	13.123	9.422		C24	8.815	15.763	8.416	8.942	7.492	8.748	19.021	23.137	34.589	21.652	15.14
	C24:1	15.655	17.279	12.364	10.843	25.268	39.987	28.793		C24:1	12.344	19.092	10.076	6.99	6.992	10.819	33.271	55.192	72.261	50.297	34.241
D
	Sphingomyelin Bone marrow d0									Sphingomyelin Bone marrow d7 P. yoelii
		Ac WT				Ac KO					Ac WT						Ac KO
	Total	563.63	664.943	432.156	390.959	281.766	442.689	351.002		Total	352.832	603.195	283.171	247.804	268.064	360.4	332.708	543.215	781.156	489.935	352.413
	C16	277.37	345.077	233.607	211.375	150.604	230.138	192.247		C16	180.505	280.615	140.435	125.668	142.022	187.97	165.658	283.074	371.394	260.137	183.984
	C18	12.343	13.985	8.707	8.749	11.04	16.816	12.091		C18	9.422	16.587	8.125	5.966	6.879	8.98	10.088	13.907	22.687	14.133	10.053
	C20	8.135	9.286	5.557	5.838	7.431	11.862	8.197		C20	6.442	11.539	5.666	3.906	4.145	5.646	6.223	7.726	14.169	8.964	5.432
	C22	51.386	55.931	35.915	33.632	27.344	43.208	32.316		C22	32.28	61.544	26.509	21.439	22.77	31.727	32.409	46.166	80.659	50.211	29.311
	C24	36.058	37.721	24.69	22.086	17.175	22.965	16.333		C24	24.665	51.825	24.145	23.458	20.945	25.625	24.089	25.878	46.724	22.828	18.925
	C24:1	178.338	202.942	123.679	109.278	68.172	117.7	89.816		C24:1	99.518	181.085	78.29	67.366	71.304	100.451	94.241	166.464	245.522	133.663	104.708
E								F
	Sphingosine								S1P
	d0		d7 P. yoelii						d0		d7 P. yoelii
	Ac WT	Ac KO	Ac WT	Ac KO					Ac WT	Ac KO	Ac WT	Ac KO
	2.592	3.31	1.642	1.824					1.234	3.073	0.968	0.537
	2.658	5.397	3.007	1.896					1.085	3.466	1.64	0.314
	2.547	3.641	1.474	4.359					0.733	2.54	0.58	1.266
	2.455		1.436	2.814					0.824		0.757	1.023
			1.699	1.884							0.662	0.71
			1.631								1.145
