# Supplementary material for: The acid ceramidase/ceramide axis controls parasitemia in Plasmodium yoelii-infected mice by regulating erythropoiesis
Source: eLife. 2022 Sep 12;11:e77975. doi: 10.7554/eLife.77975 (PMC9499531; doi:10.7554/eLife.77975)
Supplement: Figure 6—figure supplement 1—source data 1. [file elife-77975-fig6-figsupp1-data1.xlsx]

## Sheet: Fig. 6-figure supplement 1
A
	Ceramide			Sphingosine			S1P			Sphingomyelin
	Vehicle	Carmofur		Vehicle	Carmofur		Vehicle	Carmofur		Vehicle	Carmofur
	45.469	54.202		3.3	3.309		1.729	1.197		618.058	516.672
	43.602	68.616		3.243	4.328		0.97	1.474		405.679	470.174
	44.663	90.593		3.374	3.987		1.479	1.996		496.921	429.62
	67.405	50.791		3.332	2.744		1.599	1.264		755.681	1258.71
	52.47	91.242		4.273	3.779		2.093	2.41		265.681	518.448
	39.511	82.211		2.981	4.109		0.785	1.353		374.407	406.306
										351.461	483.896
										919.797	487.93
										416.168	648.262
B
	Ter119+CD71+ Blood
	d0		d3		d7		d10
	Vehicle	Carmofur	Vehicle	Carmofur	Vehicle	Carmofur	Vehicle	Carmofur
	2	1.9	1.6	0.8	1.9	1.8	2.7	2.2
	2.3	1.6	1.4	0.6	5.6	0.5	3	1.4
	2.3	1.9	2.1	0.8	3	1.8	2.9	2.5
	2.4	1.5	2.3	0.5	2.6	1	2.6	0.7
	2.1	1.8	2	0.7	2.7	1	3.3	2.8
	1.9	1.5	2.7	1.2	2.1	1.5	2.2	1.7
	2.3	1.5	2.4	1.4	3.9	1.8	2	1.3
	2	2	2.6	1.3	2	2.1	2.4	1.9
	2.2	1.8	9.7	3	2.2	1.7	1.6	1.3
	2.8	6	2.2	1.3	3	1.2	2	1.4
	2.7	2.1	2.4	1.1		1.8
	2.2	2.8	2.4	1.6		3.9
	2.7	3.8
C
	Erythropoietic stage Bone marrow d7 Non-infected
	Eb		Ret		Ery
	Vehicle	Carmofur	Vehicle	Carmofur	Vehicle	Carmofur
	46.4	15.1	35.6	35.3	17.9	48.4
	26.8	19.9	34.5	33.5	38.5	45.5
	20.8	18.4	45.9	37.3	33.1	43.2
	25.7	19.6	34.9	34.4	39.2	45
	25.4	12.8	42.9	27.1	31.6	59.2
	20.3	12.1	43.1	34.3	36.4	52.8
	15.5	15.5	31.6	31.8	52.8	51.9
	22.7	12.5	21.3	29.5	45.8	57.2
D
	d3 P. yoelii			Erythropoietic stage Bone marrow d3 P. yoelii							Erythropoietic stage Bone marrow d3 Non-infected
	Spleen weight			Eb		Ret		Ery			Eb		Ret		Ery
	Vehicle	Carmofur		Vehicle	Carmofur	Vehicle	Carmofur	Vehicle	Carmofur		Vehicle	Carmofur	Vehicle	Carmofur	Vehicle	Carmofur
	0.1694	0.1469		22.1	27.7	36	34.4	41.7	37.1		23.4	25.5	41.5	29.2	35	44.6
	0.1648	0.148		33.8	28	33.3	27.3	32.6	43.8		27.9	24.4	43.3	24	28.7	50.9
	0.147	0.1595		28.5	27.9	40.8	28.2	30.6	43		25.4	21.3	48	28	26.3	50.2
	0.2027	0.1202		23.9	24.4	43	25.1	32.7	50		23.1	23.1	38.8	28.6	37.8	47.6
	0.1867	0.1227		20.7	10.1	37	18.6	42	71		26.5	22	35.2	31.8	38	45.4
	0.1504	0.1203		33.3	25.7	38.8	24	27.6	49.4
E
	d10 P. yoelii			Erythropoietic stage Bone marrow d10 P. yoelii							Erythropoietic stage Bone marrow d10 Non-infected
	Spleen weight			Eb		Ret		Ery			Eb		Ret		Ery
	Vehicle	Carmofur		Vehicle	Carmofur	Vehicle	Carmofur	Vehicle	Carmofur		Vehicle	Carmofur	Vehicle	Carmofur	Vehicle	Carmofur
	0.8026	0.6319		62.5	58.4	20.9	17.6	16.5	23.1		23.9	28.9	43.2	18.3	32.7	52.4
	0.8565	0.7023		65.9	57.9	20.5	18	13.4	23.1		23.9	29.2	48.1	23.3	27.7	46.9
	0.9282	0.7717		62.8	57.2	21.6	18.2	15.4	23.8		29.9	34.5	45	27	24.8	37.7
	0.7062	0.7633		71.5	62.2	17.5	19.6	10.9	17.6		36.4	27.5	43.3	35.1	20.1	36.8
	0.8226	0.4885		74	63.8	17.1	19.5	8.8	16.1		25.8	27.2	45	27.1	28.7	45.1
	0.8113	0.4981		71.5	52	18.5	21.8	9.9	25.5		25.8	33.2	41.2	20.5	32.7	45.7
