# Supplementary material for: The acid ceramidase/ceramide axis controls parasitemia in Plasmodium yoelii-infected mice by regulating erythropoiesis
Source: eLife. 2022 Sep 12;11:e77975. doi: 10.7554/eLife.77975 (PMC9499531; doi:10.7554/eLife.77975)
Supplement: Figure 6—figure supplement 2—source data 1. [file elife-77975-fig6-figsupp2-data1.xlsx]

## Sheet: Fig. 6-figure supplement 2
		Growth
		Chloroquine
	0,3 nM	138.255	117.66	71.4888
	1 nM	149.699	121.033	56.2807
	3 nM	156.298	130.363	60.2058
	10 nM	146.578	117.009	56.7192
	30 nM	65.2814	44.4386	32.3261
	100 nM	53.2102	30.2377	20.5592
