# Supplementary material for: The acid ceramidase/ceramide axis controls parasitemia in Plasmodium yoelii-infected mice by regulating erythropoiesis
Source: eLife. 2022 Sep 12;11:e77975. doi: 10.7554/eLife.77975 (PMC9499531; doi:10.7554/eLife.77975)
Supplement: Figure 6—source data 1. [file elife-77975-fig6-data1.xlsx]

## Sheet: Fig. 6
B
	Parasitemia
		Vehicle											Carmofur
	d3	1.1	0.99	0.84	1.19	0.85	0.63	0.9	0.83	1.22	1.58	1.7	0.7	1.02	0.76	0.69	0.66	0.43	0.53	0.72	0.56	0.49	0.66
	d7	1.52	1.54	1.47	1.69	3.93	2.72	1.52	4.24	4.5	3.82	3.77	2.01	1.16	2.04	1.46	1.83	1.23	1.34	1.18	0.94	1.65	1.49
	d10	10.59	12.21	19.83	11.01	11.56	19.19	11	12.11	11.5	13.25	14.66	7.61	11.01	8.22	5.5	8.36	6.81	9.23	6.98	2.69	2.25	2.23
	d14	42.24	54.15	40.55	29.42	14.05	38.05	27.97	26.93	24.65	23.8	25	22.57	11.23	27.23	29.67	17.29	19.9	32.15	10.18	6.34	7.38
C
	Spleen weight
	Vehicle	Carmofur
	0.4593	0.3133
	0.3387	0.3352
	0.5375	0.365
	0.4606	0.4091
	0.5392	0.3981
	0.4297	0.2788
	0.4922	0.3482
	0.4089	0.3997
	0.4071	0.3723
D
	Ceramide			Sphingosine			S1P			Sphingomyelin
	Vehicle	Carmofur		Vehicle	Carmofur		Vehicle	Carmofur		Vehicle	Carmofur
	47.455	57.782		2.899	3.089		1.371	0.887		452.03	311.107
	40.893	57.655		2.237	2.996		1.35	1.479		714.305	638.012
	36.217	59.36		2.772	2.747		1.27	1.027		421.434	380.507
	34.552	54.41		2.123	2.58		1.058	1.711		346.038	355.404
	49.55	86.478		2.825	4.429		1.004	1.903		506.705	689.506
	50.879	52.123		3.395	2.672		1.446	1.23		379.762	799.82
										588.981	819.342
										938.111	844.112
										367.219	595.799
E
	Ter119+CD71+ Blood
	d0		d3		d7		d10
	Vehicle	Carmofur	Vehicle	Carmofur	Vehicle	Carmofur	Vehicle	Carmofur
	2	1.9	0.8	0.2	3.4	0.4	16.3	5.6
	2.3	1.6	0.5	0.4	3.2	0.9	14.7	11.5
	2.3	1.9	0.4	0.2	3.6	0.5	12.5	6.6
	2.4	1.5	0.6	0.6	3.2	1.2	18.5	11.8
	2.2	1.8	0.6	0.5	3.5	1.6	14.8	11.2
	2.8	6	0.9	0.4	4.7	1.5	12.6	6.8
	2.7	2.1	0.7	0.5	4	1.2	12	6
	2.2	2.8	0.7	1.1	4.6	1.7	16	6.2
	2.7	3.8	0.6	0.6	4.6	1.2	17.6	8
	2.2	2.2	1.6	0.9	4.2	1.9	11.5	8.6
	1.9	3.4	0.5	0.9	4.4	2.7	12.5	3.9
	2.9	2	2.6	0.7	7.9	1.9	10.7	7.2
	2.7	2.3	1	0.5
	9.4	2.5	0.4	0.4
			1.6	0.5
			0.5	0.6
			0.6	0.3
			0.7	0.5
F
	Erythropoietic stage Bone marrow
	Eb		Ret		Ery
	Vehicle	Carmofur	Vehicle	Carmofur	Vehicle	Carmofur
	49	25.8	31	34.5	19.7	38.7
	42	30.5	34.8	28.4	23	40.3
	50.7	31	31	30.9	18.2	37.1
	43.1	31.2	33.3	33.9	23.4	33.5
	39.8	26.9	30.6	32.8	29.4	39.1
	40.2	22.1	32.7	31.7	26.9	44.9
	38.3	39.7	28.1	31.5	33.3	28.1
	42.9	26.1	32	30.2	24.9	42.5
	54.9	24.5	30.1	27.2	14.8	47.3
G
		Growth
		Carmofur			DMSO
	0,3 µM	111.968	120.397	88.5675	103.191	97.4603	93.6839
	1 µM	127.361	123.453	110.365	93.0754	96.3971	112.632
	3 µM	134.319	134.323	122.252	100.662	101.004	110.133
	10 µM	121.645	125.736	110.089	102.108	103.13	108.676
	30 µM	86.4132	93.7368	96.2489	108.249	102.776	95.5579
	100 µM	33.3013	27.5504	40.3113	92.7141	99.2322	79.3165
