# Supplementary material for: The acid ceramidase/ceramide axis controls parasitemia in Plasmodium yoelii-infected mice by regulating erythropoiesis
Source: eLife. 2022 Sep 12;11:e77975. doi: 10.7554/eLife.77975 (PMC9499531; doi:10.7554/eLife.77975)
Supplement: Figure 7—source data 1. [file elife-77975-fig7-data1.xlsx]

## Sheet: Fig. 7
B
	Ter119+CD71+ Blood
	d0		d3		d5		d7		d10		d14
	Vehicle	Carmofur	Vehicle	Carmofur	Vehicle	Carmofur	Vehicle	Carmofur	Vehicle	Carmofur	Vehicle	Carmofur
	2.5	2	2.1	1	1.5	0.1	5.5	2.7	18.5	10.9	62.8	62.9
	2.5	2.1	1.3	1.6	1.3	1.1	4	3.1	12.1	11.9	64.9	68.3
	2.2	2.1	2.8	1.3	0.8	1.3	6.6	1.7	17.5	8.1	64.9	46
	2	2.6	0.8	1.7	1.2	1.1	3.4	2.2	11.4	8.8	57.7	37.1
	2	2.3	1.7	3.1	0.9	0.9	3.4	1.1	10.6	6.9	46.9	47.1
			1	1.7			4.3	0.4	15.8	8.6	56.2	32.5
			0.9	0.8			4.2	1.8	14	8	55.7	42.8
			0.7	1.1			3.3	2	13.1	8.6	52.9	46.9
			2.2	1.1			0.2	2.2	7.7	8	48.2	41.3
			1.7	1.6			0.5	0.1	9.8	2.3	47.4	10.8
C
	Parasitemia
		Vehicle										Carmofur
	d3	2.03	1.39	1.59	1.72	1.58	0.6	0.66	1.04	0.34	0.49	1.58	1.9	1.88	1.67	1.27	1.29	0.82	1.2	0.91	0.37
	d5	2.51	1.78	2.16	1.98	1.62	1.36	1.33	1.54	1.61	1.07	1.99	2.11	2.19	1.9	1.6	1.96	1.48	1.58	1.57	1.61
	d7	4.1	4.84	7.34	4.81	4.12	3.14	4.47	4.54	1.8	2.13	1.54	1.96	1.31	1.78	1.32	2.5	1.99	1.49	2.24	1.84
	d10	13.11	10.97	14.42	13.74	14.89	8.71	11.07	9.58	7.62	7.22	2.77	7.65	6.6	7.81	5.38	2.42	5.87	4.95	5.9	3.71
	d14	37.7	33	46.2	41.1	31	40.73	35	25.9	35.21	29.44	9.6	13.1	26	16.9	14.5	21.72	10.44	16.38	14.39	5.29
D						E
	Spleen weight						RBCs
	Vehicle	Carmofur					d0		d7		d10		d14
	1.3358	1.259					Vehicle	Carmofur	Vehicle	Carmofur	Vehicle	Carmofur	Vehicle	Carmofur
	1.2829	0.8785					1.1	1.09	0.62	0.85	0.37	0.53	0.29	0.41
	1.0509	1.2454					1.12	1.07	0.78	0.73	0.35	0.45	0.31	0.41
	1.2634	0.9095					1.07	1.11	0.65	0.79	0.46	0.66	0.3	0.36
	0.9565	1.1253					1.16	1.15	0.75	0.74	0.43	0.55	0.37	0.39
	1.155	0.8843					1.09	0.97	0.81	0.79	0.59	0.56	0.41	0.49
	1.0412	0.9329											0.36	0.39
	1.0143	1.0555											0.32	0.39
	1.2348	0.8845											0.36	0.4
	1.3106	0.6163											0.35	0.46
													0.42	0.32
